# Supplementary material for: Exploring Gut Microbial Dynamics and Symbiotic Interaction in Blattella germanica Using Rifampicin
Source: MDPI journal article supplement (doi:10.3390/biology12070955), 2023-07-03
Supplement: s1 [file s1]

Exploring Gut Microbial Dynamics and Symbiotic Interaction in *Blattella germanica* Using Rifampicin

Monica Cazzaniga, Rebeca Domínguez-Santos, Jesús Marín-Miret, Rosario Gil, Amparo Latorre and Carlos García-Ferris

Figure S1

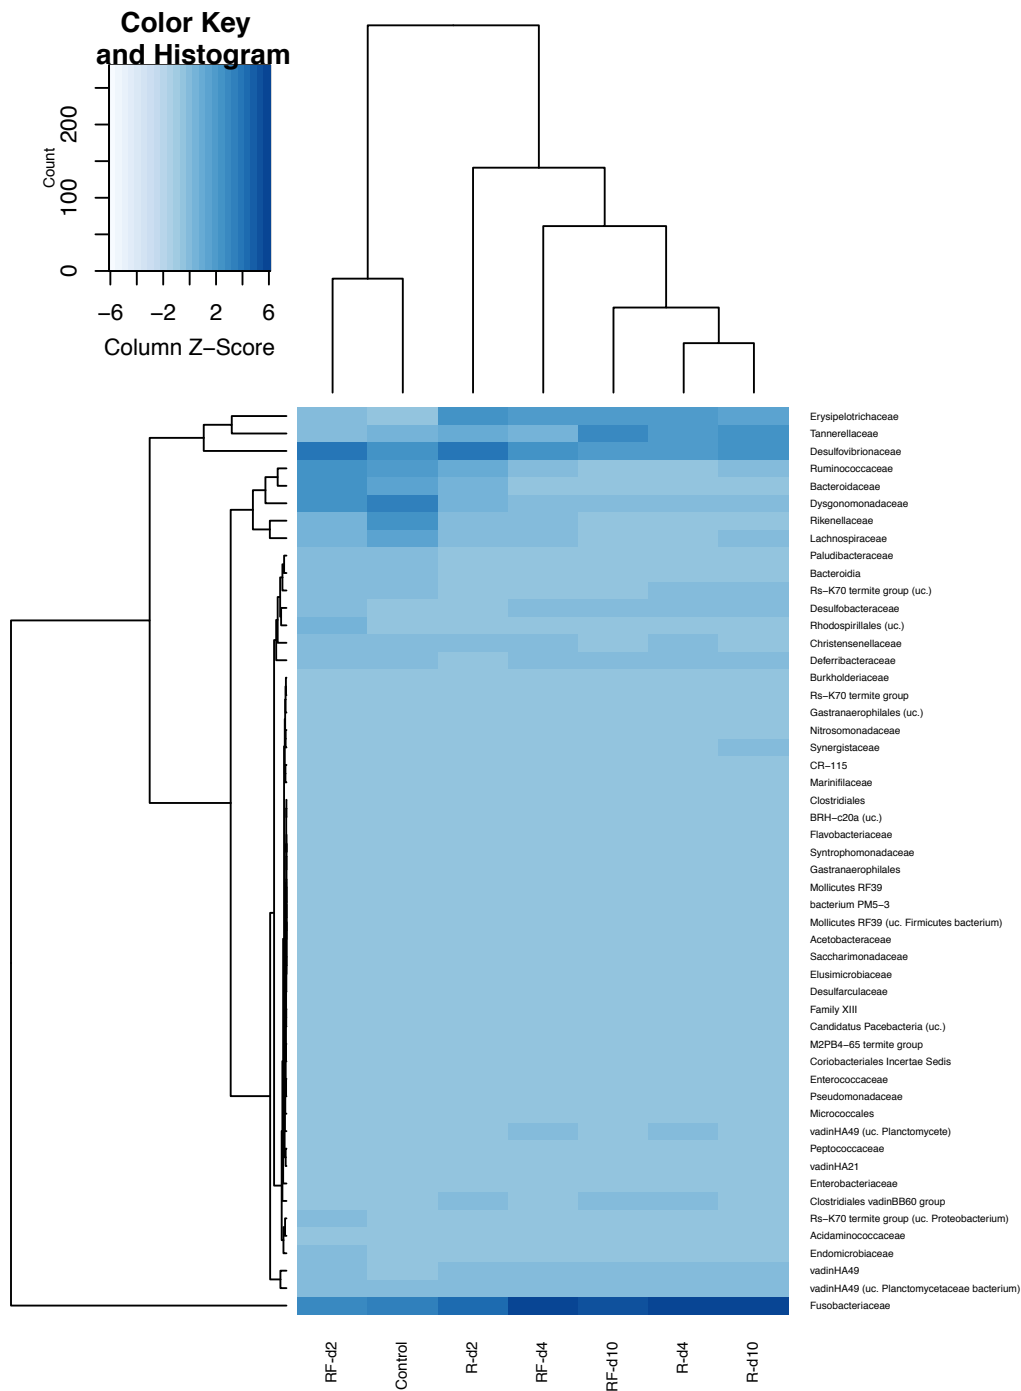

**Figure S1.** Heatmap and clustering based on taxon composition and Z-score transformed relative abundance of the gut microbiota corresponding to d2, d4 and d10 of treatment. Three populations were analysed: control (C, corresponding to grouped C-d2 to C-d10), treated with rifampicin (R), and treated with rifampicin and faeces (RF). Different experimental conditions are shown on the x-axis and the family of the taxa identified in each sample on the y-axis. The shade of colours was related to the Z-score of these taxa in each sample; light and dark blue indicate lower to higher abundance, respectively.
